# Supplementary material for: Prevalent Glucocorticoid and Androgen Activity in US Water Sources
Source: PubMed Central journal article supplement (PMC3515810; doi:10.1038/srep00937), 2012-12-06
Supplement: srep00937-s1.pdf [file srep00937-s1.pdf]

## Supplementary Information

### Prevalent Glucocorticoid and Androgen Activity in US Water Sources

**Authors :** Diana A. Stavreva<sup>1,\*</sup>, Anuja A. George<sup>1,4</sup>, Paul Klausmeyer<sup>2</sup>, Lyuba Varticovski<sup>1</sup>, Daniel Sack<sup>1</sup>, Ty C. Voss<sup>1</sup>, R. Louis Schiltz<sup>1</sup>, Vicki S. Blazer<sup>3</sup>, Luke R. Iwanowicz<sup>3,\*</sup>, and Gordon L. Hager<sup>1,\*</sup>

#### **Affiliations:**

<sup>1</sup> Laboratory of Receptor Biology and Gene Expression, National Cancer Institute, NIH, Bethesda, MD 20892-5055

<sup>2</sup> Natural Products Support Group, SAIC-Frederick, Inc., Frederick National Laboratory for Cancer Research, Frederick, MD 21702

<sup>3</sup> USGS-BRD, Leetown Science Center, 11649 Leetown Road, Kearneysville, WV 25430

<sup>4</sup> Present address: Department of Pharmacology, UMDNJ-Robert Wood Johnson Medical School, Piscataway, New Jersey 08854

\*To whom all correspondence should be addressed: [hagerg@exchange.nih.gov](mailto:hagerg@exchange.nih.gov)  
[stavreva@mail.nih.gov](mailto:stavreva@mail.nih.gov)  
[luke\\_iwanowicz@usgs.gov](mailto:luke_iwanowicz@usgs.gov)

**Supplementary Information Content:** Supplementary Figures S1-9  
Supplementary Tables S1-4

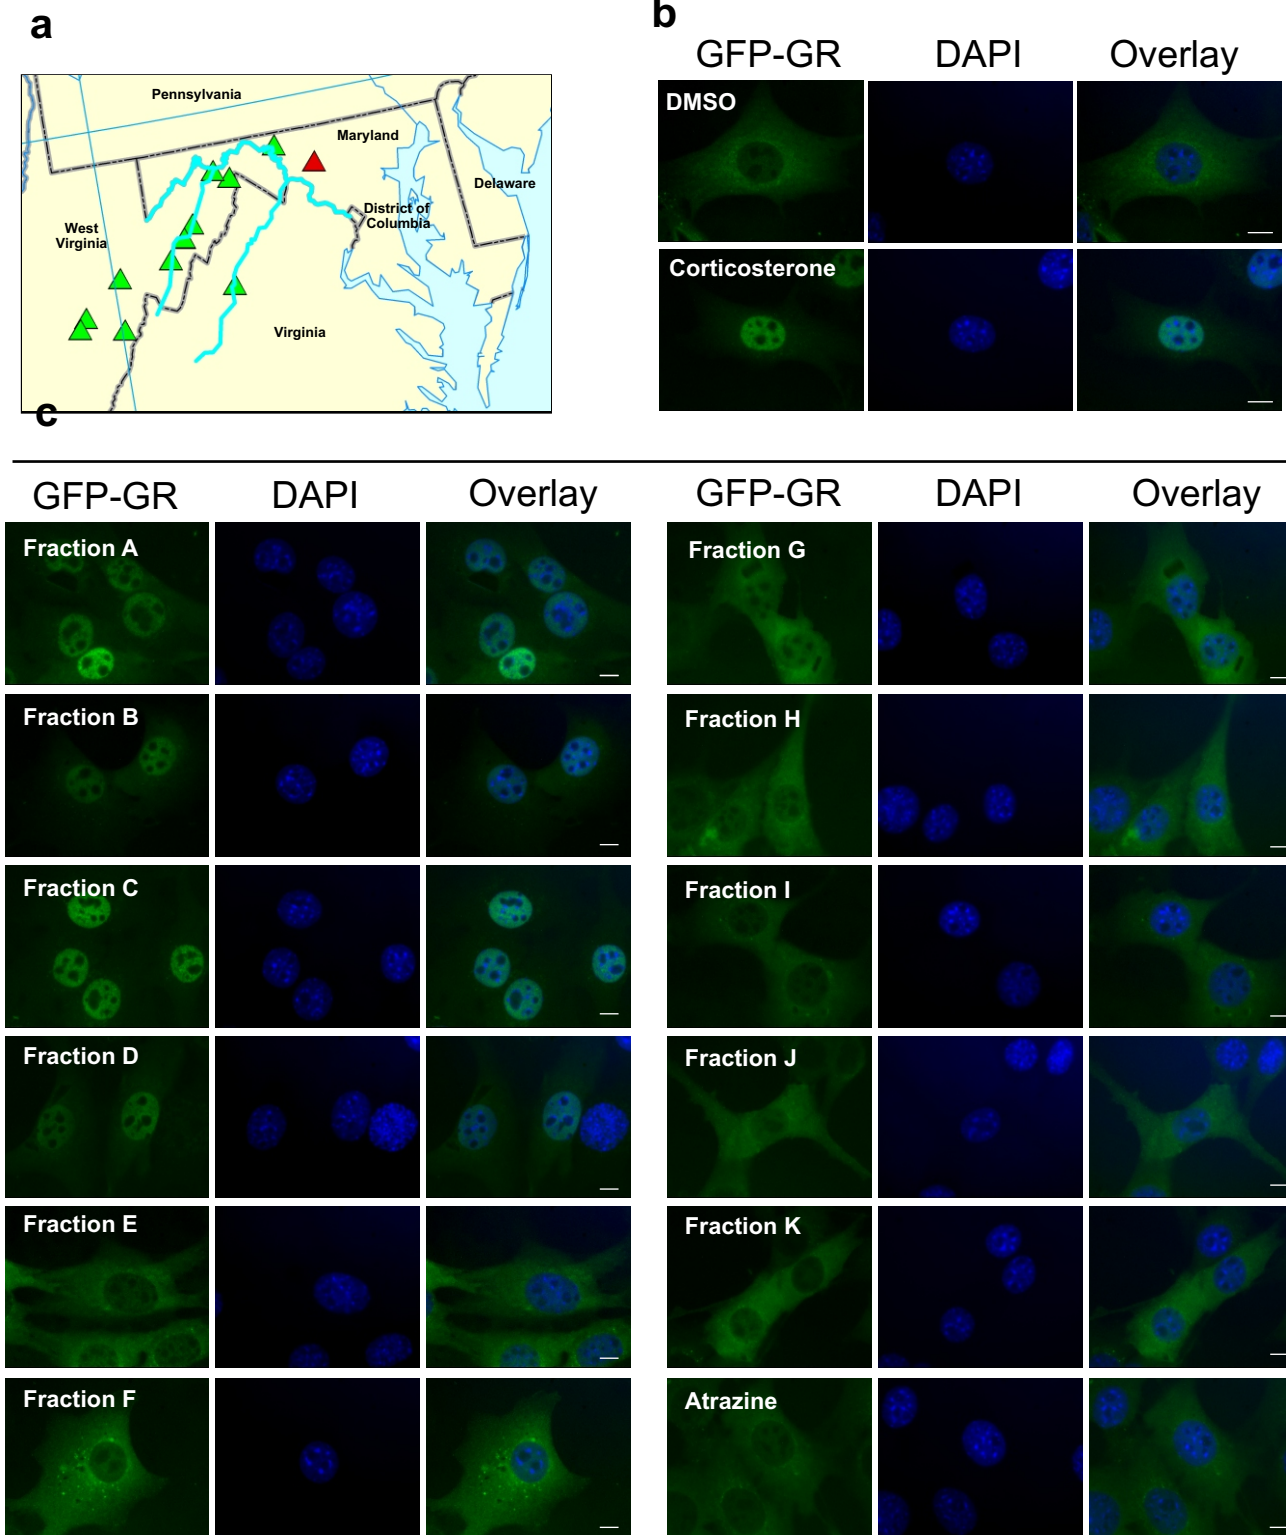

**Supplementary Figure S1. Collection sites of the first sample set and testing of HPLC fractions from sample SS97 for GR translocation.** (a) Geographic locations of the collection sites of the first sample set collected by POCIS. One of the samples (marked with red, SS97) tested positive for GFP-GR translocation, suggesting a presence of glucocorticoid activity. Negative samples are marked with green. (b) GFP-GR translocation in a mammalian cell line<sup>15</sup> upon stimulation with 100 nM corticosterone for 30 min. Nuclei are stained with DAPI. Scale bar, 5  $\mu$ m. (c) HPLC fractions of sample SS97 (A-K) were tested for GFP-GR translocation to determine the presence of glucocorticoid activity. Four of 11 fractions (A-D) tested positive for GFP-GR translocation. Because GC/MS analyses detected atrazine in sample SS97, we included it in our analysis (bottom right). However, atrazine did not induce GFP-GR translocation.

Peak 1

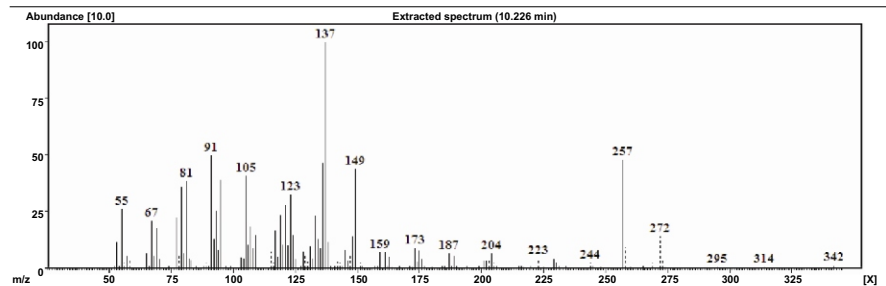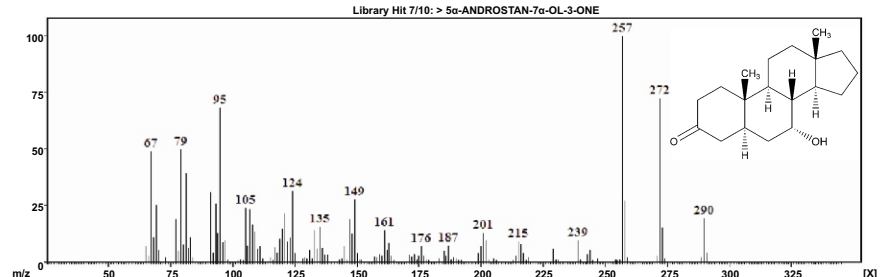

Peak 2

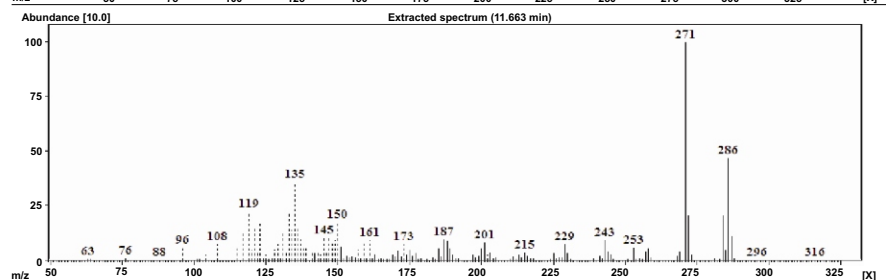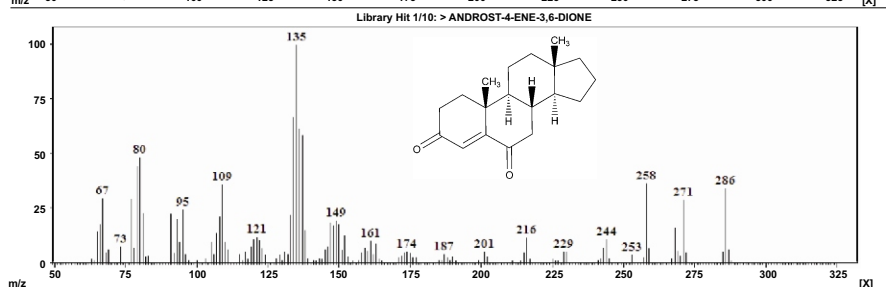

Peak 3

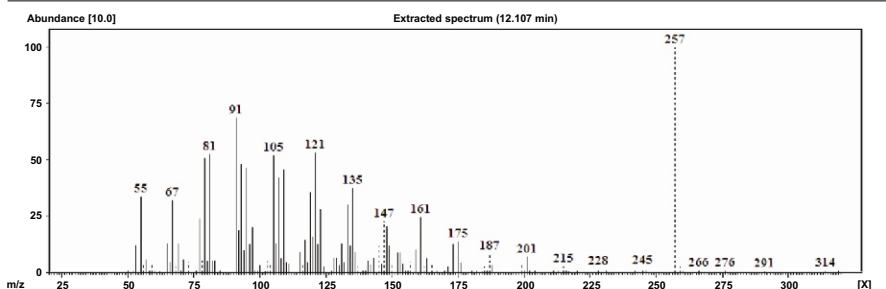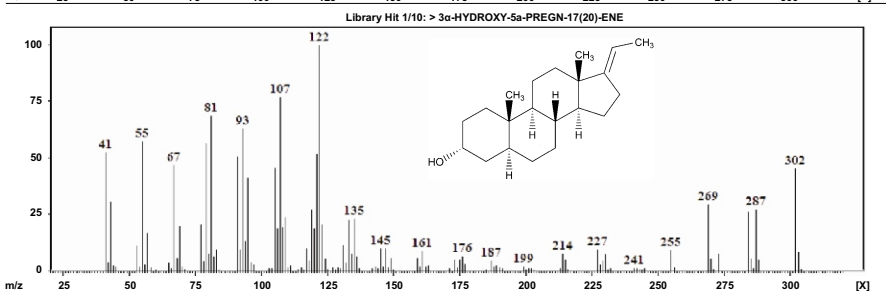

**Supplementary Figure S2. Database searching of the extracted MS chromatographic peaks 1-3 (Fig. 1d) suggest that the compounds were similar in structure to known androstane-type steroids. Visual comparison of the mass spectra of chromatographic peaks 1-3 (Fig. 1d) with standard spectra from the AES 2010 database suggests similarities to known androstane-class compounds.**

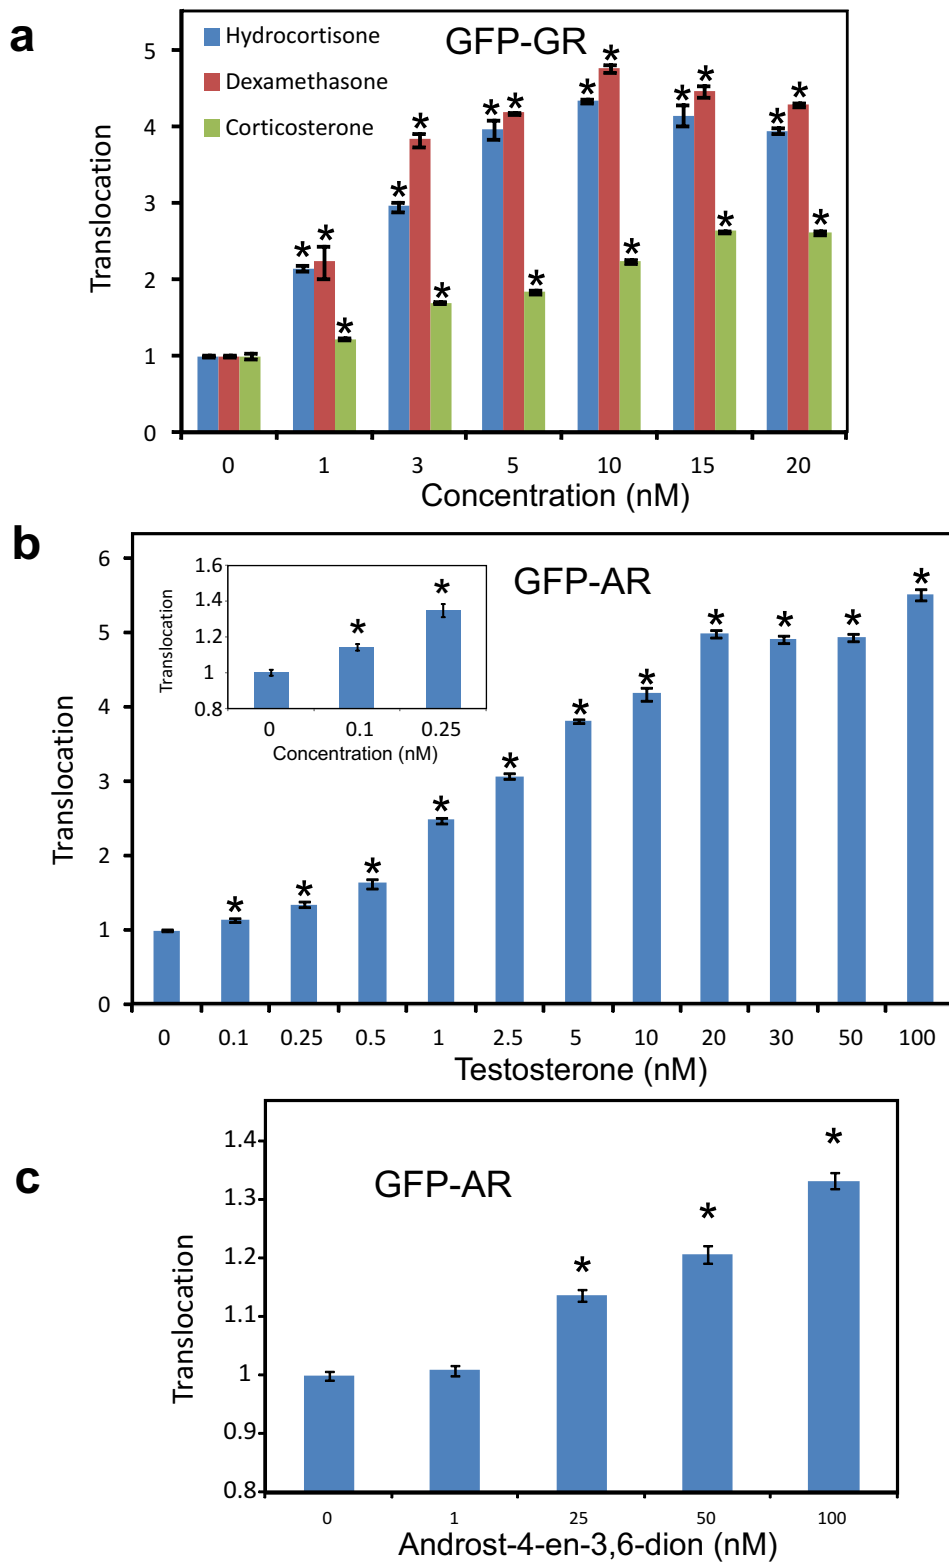

**Supplementary Figure S3. Concentration-dependent translocation of GFP-GR and GFP-AR in response to their respective hormones as detected by the Opera (Perkin Elmer) automated imaging analysis system.** (a) GFP-GR translocates to the nucleus in a concentration-dependent manner upon treatment with known concentrations of hydrocortisone, dexamethasone, or corticosterone. An algorithm for cytoplasm and nuclear segmentation of the cells was used to determine the mean GFP-GR intensity in both compartments and translocation was quantified as a ratio of these intensities. Each value was normalized to the control sample. Error bars represent the mean value  $\pm$  s.e.m,  $n=6$  ( $P<0.05$ , asterisks). (b) GFP-AR translocation in response to known concentrations of testosterone. Insert shows that testosterone concentrations as low as 0.1 nM induced a statistically significant increase in the GFP-AR translocation. Samples with  $P<0.05$  are indicated by an asterisk. Error bars represent the mean value  $\pm$  s.e.m,  $n=6$ . (c) Androst-4-en-3,6-dione induces concentration-dependent translocation of the GFP-AR construct ( $P<0.05$ , asterisks). Error bars represent the mean value  $\pm$  s.e.m,  $n=6$ .

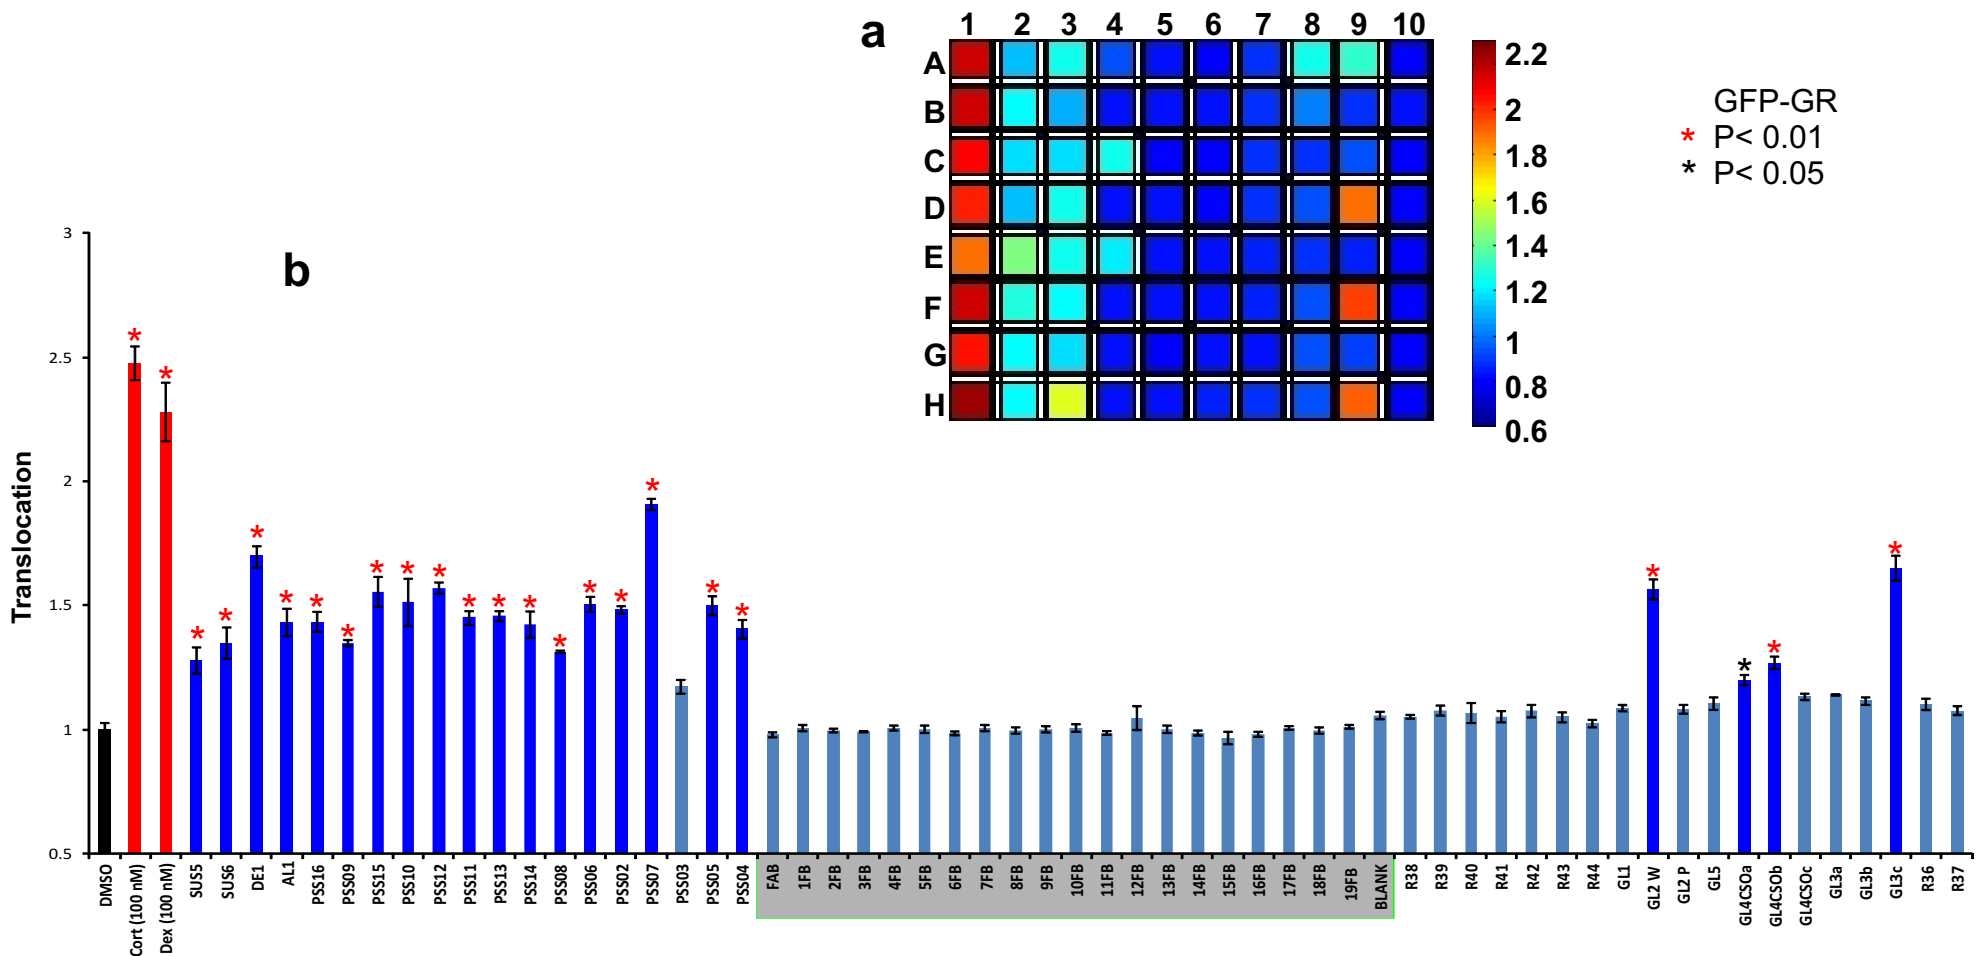

**Supplementary Figure S4. Additional samples screened for GFP-GR nuclear translocation.** (a) Image analysis plate map showing a portion of GFP-GR expressing cells plated on a 384 well plate. Twenty two samples out of 38 (58 %) tested positive for GFP-GR nuclear translocation. Wells 10A-H are negative controls (DMSO). Wells 1A-H and 9D, 9F, 9H are positive controls treated with 100 nM corticosterone and 100 nM dexamethasone, respectively. (b) GFP-GR nuclear translocation results summary. All samples in the gray box are POCIS negative controls. Positive samples are marked with asterisks ( $P < 0.01$ , red asterisks and  $P < 0.05$ , black asterisks). Error bars represent the mean value  $\pm$  s.e.m,  $n=4$ .

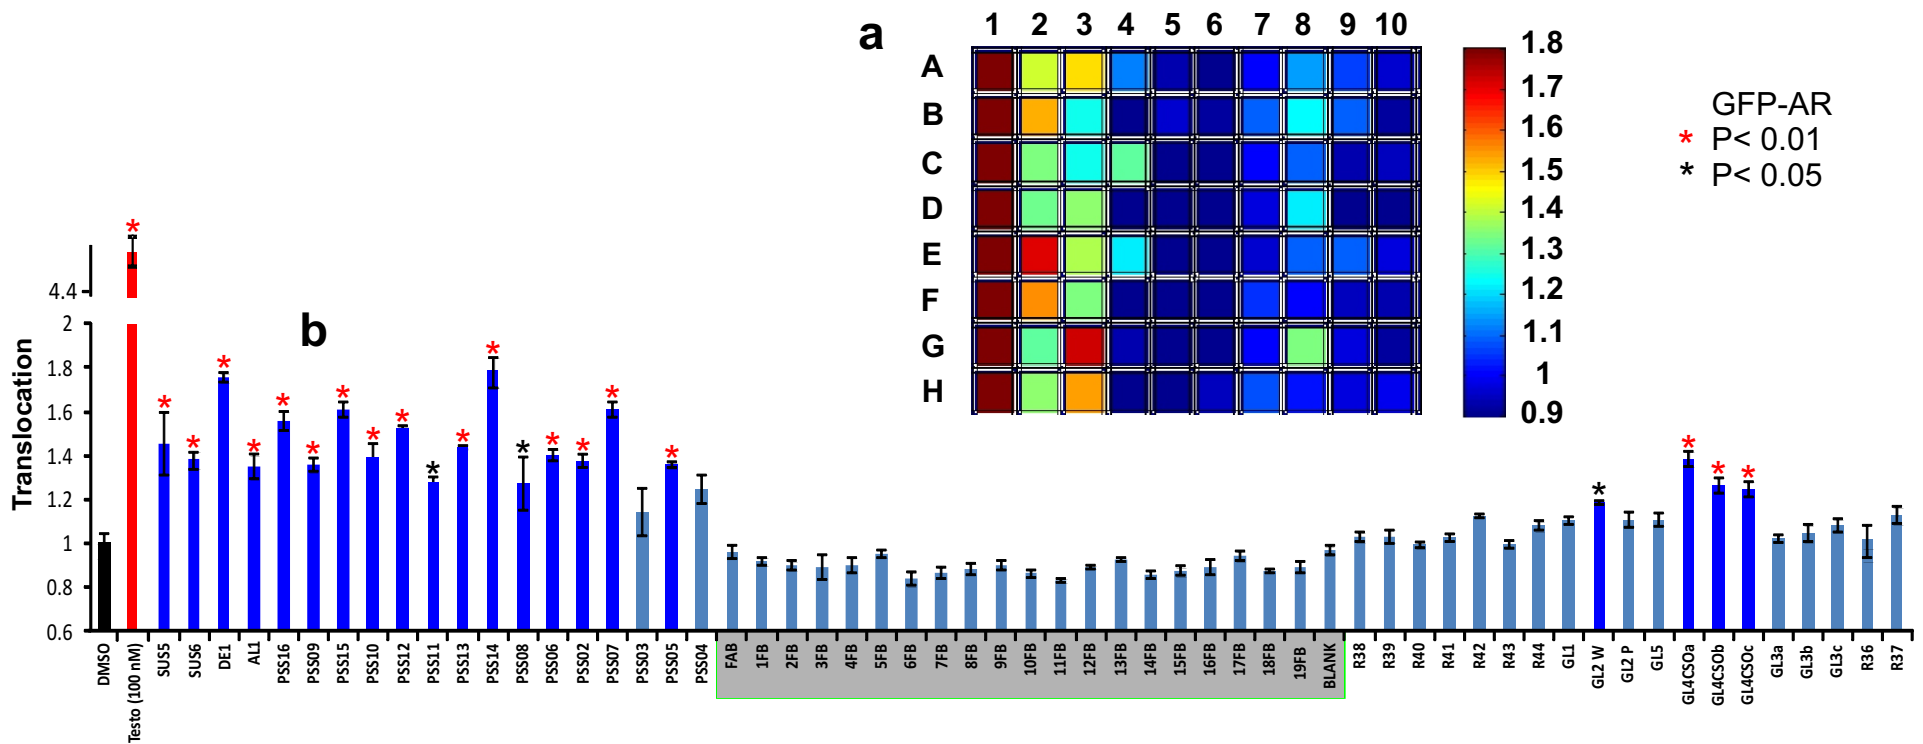

**Supplementary Figure S5. Additional samples screened for GFP-AR nuclear translocation.** (a) Image analysis plate map showing a portion of GFP-AR expressing cells plated on a 384 well plate. Twenty one samples out of 40 (55 %) tested positive for GFP-AR nuclear translocation. Wells 10A-H are negative controls (DMSO). Wells 1 A-H are positive controls for cells treated with 100 nM testosterone. (b) GFP-AR nuclear translocation results summary. All samples in the gray box are POCIS negative controls. Positive samples are marked with asterisks ( $P < 0.01$ , red asterisks and  $P < 0.05$ , black asterisks). Error bars represent the mean value  $\pm$  s.e.m,  $n=4$ .



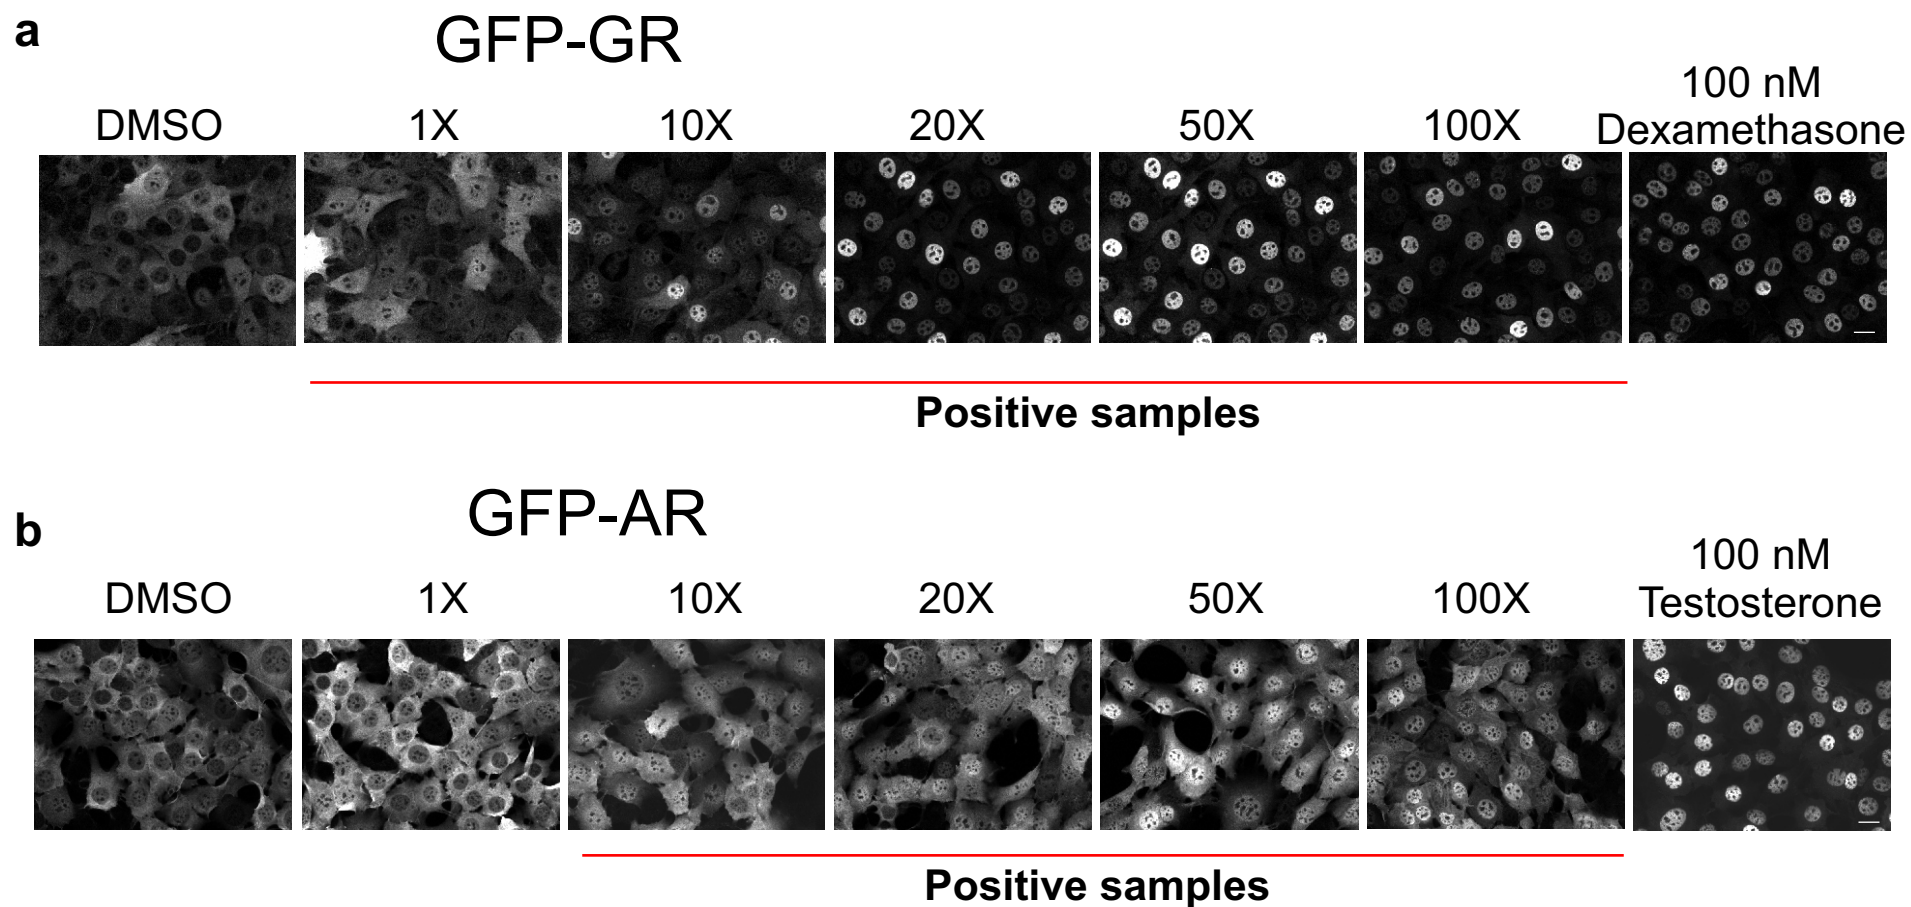

**Supplementary Figure S6. Concentration-dependent GFP-GR and GFP-AR translocation induced by the newly collected sample from the same location as SS97.** (a) Representative images for the concentration-dependent GFP-GR translocation in response to known concentrations of the water sample at site SS97. Scale bar, 10  $\mu$ m. (b) Representative images for concentration-dependent GFP-AR translocation in response to known concentrations of the water sample at site SS97. Scale bar, 10  $\mu$ m.

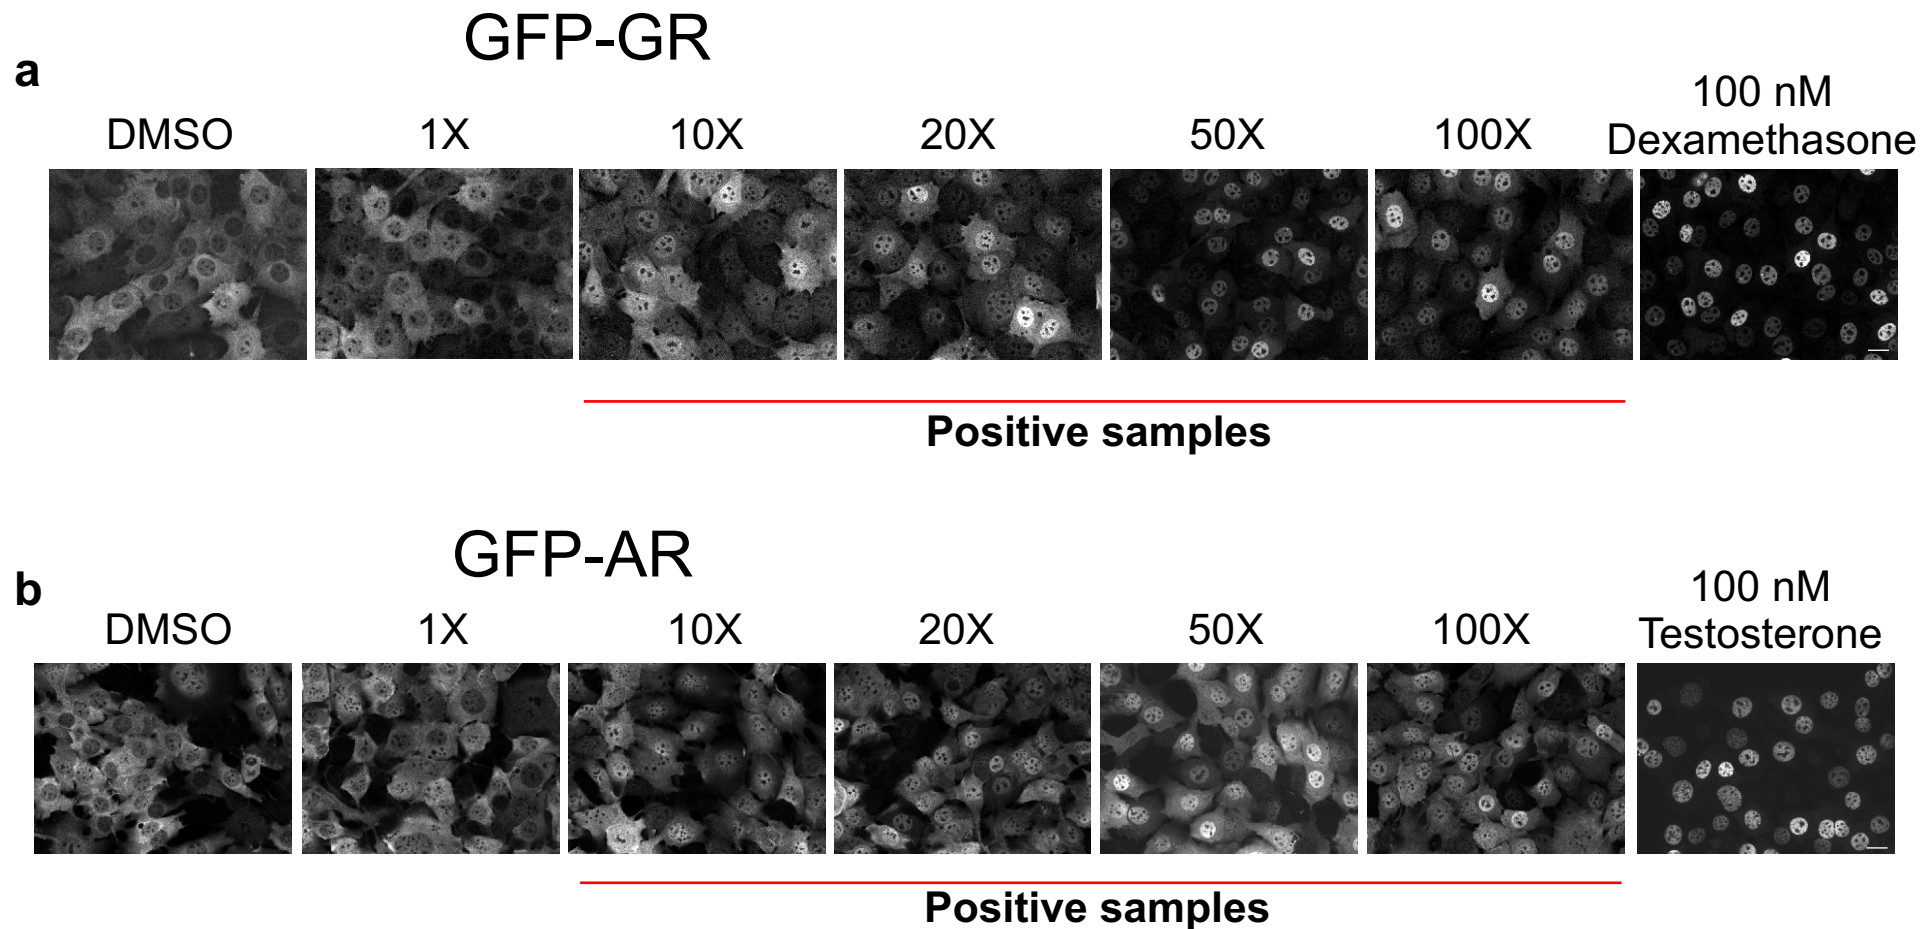

**Supplementary Figure S7. Concentration-dependent GFP-GR and GFP-AR translocation induced by the newly collected sample from the same location as GL2W.** (a) Representative images for concentration-dependent GFP-GR translocation in response to known concentrations of the water sample at site GL2W. Scale bar, 10  $\mu\text{m}$ . (b) Representative images for the concentration-dependent GFP-AR translocation in response to known concentrations of the water sample at site GL2W. Scale bar, 10  $\mu\text{m}$ .



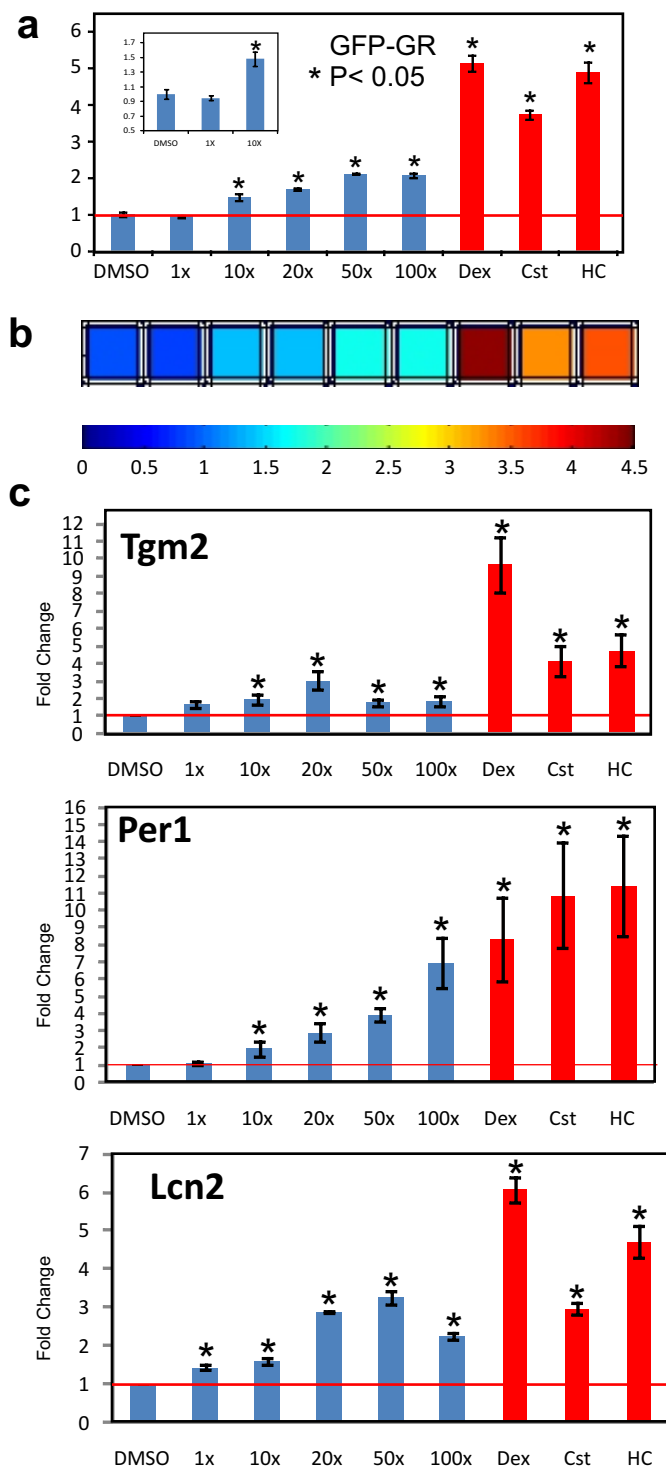

**Supplementary Figure S8. Concentration-dependent GFP-GR translocation and transcriptional activation of GR-regulated genes in response to the newly collected sample from the same location as GL2W.** (a) Translocation of GFP-GR in response to newly collected sample from the same location as GL2W (see also Supplementary Fig. S7a). Translocation was calculated as a ratio of the nuclear versus cytoplasmic intensity and each value was further normalized to the value for the control sample. Samples positive for GFP-GR translocation are marked with asterisks ( $P < 0.05$ ). The lowest concentration inducing GFP-GR translocation is 10x. DMSO negative control, Dex (dexamethasone, 100 nM), Cst (corticosterone, 100 nM), and HC (hydrocortisone, 100 nM) were included as positive controls. Error bars represent the mean value  $\pm$  s.e.m,  $n=4$ . (b) Representative raw data heat-map for GFP-GR translocation as in panel A. (c) Concentration-dependent transcriptional activation of GR-regulated genes induced by newly collected sample from GL2W site. All concentrations induced transcriptional activation of at least one of the GR-regulated genes ( $P < 0.05$ , asterisks). Transcription responses are presented as fold change in comparison to the vehicle control sample (DMSO). Dex (dexamethasone, 100 nM), Cst (corticosterone, 100 nM), and HC (hydrocortisone, 100 nM) are included as positive controls. Error bars represent the mean  $\pm$  s.e.m,  $n=4$ .

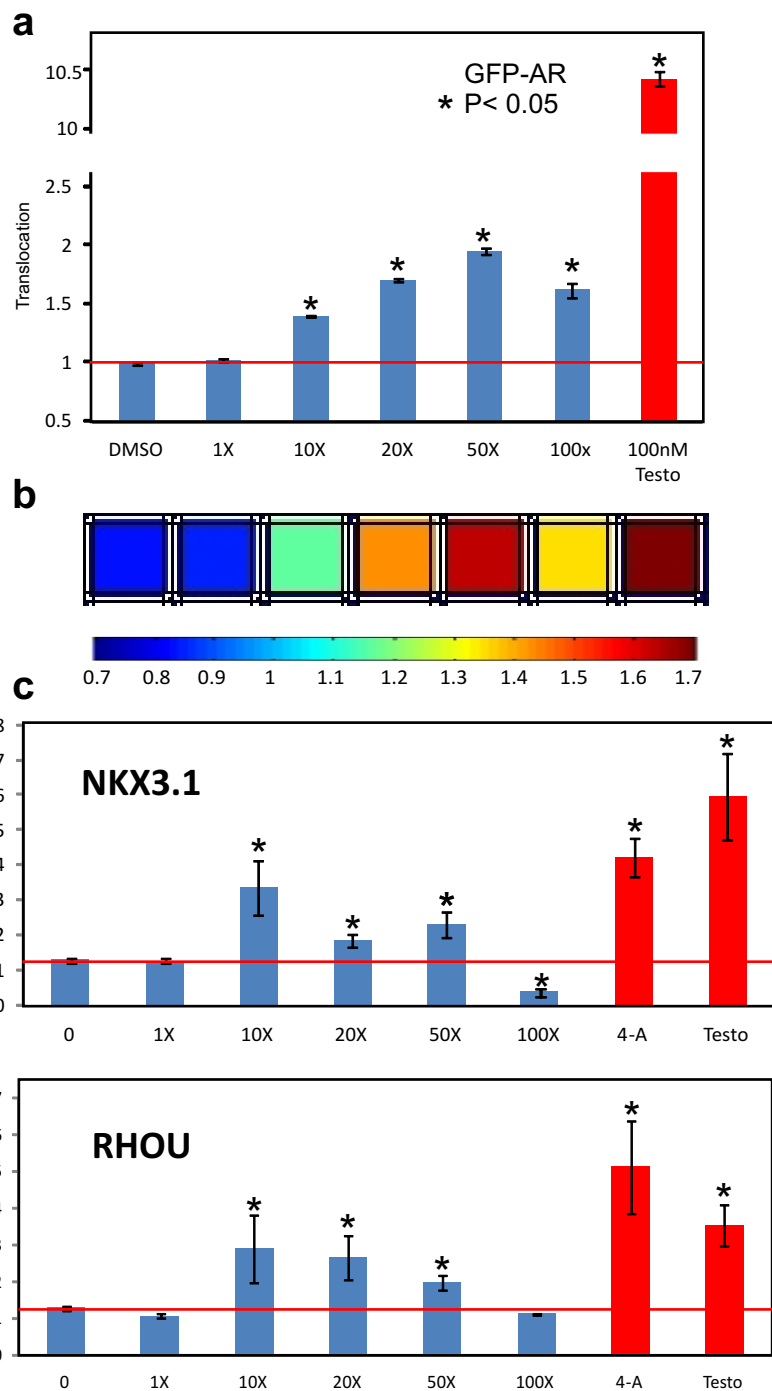

**Supplementary Figure S9. Concentration-dependent GFP-AR translocation and transcriptional activation of AR-regulated genes in response to the newly collected sample from GL2W site.** (a) Quantification of the GFP-AR concentration-dependent translocation response for the newly collected water sample at the GL2W site (see also Supplementary Fig. S7b). Translocation was calculated as a ratio of the nuclear versus cytoplasmic intensity and each value was further normalized to the value for the control sample. Samples positive for GFP-AR translocation are marked with asterisks ( $P<0.05$ ). The lowest sample concentration inducing GFP-AR translocation is 10x. Testosterone (Testo, 100 nM) is included as a positive control. Error bars represent the mean value  $\pm$  s.e.m,  $n=4$ . (b) Representative raw data heat-map for GFP-AR translocation as in panel (a). (c) Concentration-dependent transcriptional activation of AR-regulated genes induced by newly collected sample from GL2W site in LNCaP cells which express endogenous AR. Concentrations 10x to 50x induced transcriptional activation in the AR-regulated genes NKX3.1 and RHOA ( $P<0.05$ , asterisks). At 100x concentration, we observed a reduced NKX3.1 expression, and did not detect change in RHOA transcription, suggesting a nonmonotonic dose-response or the presence of an inhibitory activity (possibly anti-androgenic) which is apparent at that concentration. Transcriptional responses are presented as fold change in comparison to the vehicle treated (DMSO) control sample. Androst-4-en-3,6-dione (100 nM) and testosterone (Testo, 100 nM) are included as positive controls. Error bars represent the mean  $\pm$  s.e.m,  $n=4$ .

**Supplementary Table S1. Collection sites and collection time of the first sample set.**

| <b>Samples</b> | <b>Date/year</b> | <b>Location</b>                          | <b>Collection method</b> |
|----------------|------------------|------------------------------------------|--------------------------|
| Blank          | Oct-Nov 2005     |                                          | POCIS                    |
| WV2            | Oct-Nov 2005     | South Branch Potomac, Franklin, WV       | POCIS                    |
| WV3            | Oct-Nov 2005     | South Branch Potomac, Springfield, WV    | POCIS                    |
| WV4            | Oct-Nov 2005     | South Branch Potomac, Moorefield, WV     | POCIS                    |
| WV5            | Oct-Nov 2005     | Elk River, WV                            | POCIS                    |
| WV6            | Oct-Nov 2005     | South Branch Potomac, Petersburg Gap, WV | POCIS                    |
| WV7            | Oct-Nov 2005     | Greenbrier River, WV                     | POCIS                    |
| SS83           | 6/1/2007         |                                          | POCIS                    |
| SS92           | 5/3/07-6/7/07    | Gauley River, WV                         | POCIS                    |
| SS93           | 4/11/07-5/9/07   | Lower Conococheague River, MD            | POCIS                    |
| SS94           | 4/11/07-5/9/07   | Upper Conococheague River, MD            | POCIS                    |
| SS95           | 4/27/07-5/31/07  | South Branch Potomac, Petersburg Gap, WV | POCIS                    |
| SS97           | 4/11/07-5/9/07   | Lower Monocacy River, MD                 | POCIS                    |
| SS98           | 4/5/07-5/9/07    | South Fork, Shenandoah River, VA         | POCIS                    |

**Supplementary Table S2. Synthetic glucocorticoids surveyed by monitoring the mass spectrometric data for the presence of the corresponding molecular ion in sample SS97.**

|           |                                   |
|-----------|-----------------------------------|
| <b>1</b>  | <b>amcinonide</b>                 |
| <b>2</b>  | <b>betamethasone</b>              |
| <b>3</b>  | <b>budesonide</b>                 |
| <b>4</b>  | <b>clobetasone</b>                |
| <b>5</b>  | <b>clobetasol</b>                 |
| <b>6</b>  | <b>propionate</b>                 |
| <b>7</b>  | <b>desonide</b>                   |
| <b>8</b>  | <b>fluocinonide</b>               |
| <b>9</b>  | <b>fluocinolone acetonide</b>     |
| <b>10</b> | <b>fluocortolone</b>              |
| <b>11</b> | <b>fluprednidene acetate</b>      |
| <b>12</b> | <b>halcinonide</b>                |
| <b>13</b> | <b>hydrocortisone</b>             |
| <b>14</b> | <b>hydrocortisone-17-butyrate</b> |
| <b>15</b> | <b>methylprednisolone</b>         |
| <b>16</b> | <b>mometasone</b>                 |
| <b>17</b> | <b>mometasone furoate</b>         |
| <b>18</b> | <b>prednicarbate</b>              |
| <b>19</b> | <b>prednisolone</b>               |
| <b>20</b> | <b>prednisone</b>                 |
| <b>21</b> | <b>triamcinolone acetonide</b>    |

Supplementary Table S3. Closest EIMS library matches of the mass spectra of chromatographic peaks 1-3 in Fig. 1d.

| Peak # | Observed MW | Closest EIMS Library Match                                               | Structure                                                                                                                                                                                                                                                                                                                      |
|--------|-------------|--------------------------------------------------------------------------|--------------------------------------------------------------------------------------------------------------------------------------------------------------------------------------------------------------------------------------------------------------------------------------------------------------------------------|
| 1      | 272         | 7 $\alpha$ -Hydroxy-5 $\alpha$ -androstan-3-one,<br>MW 290               | 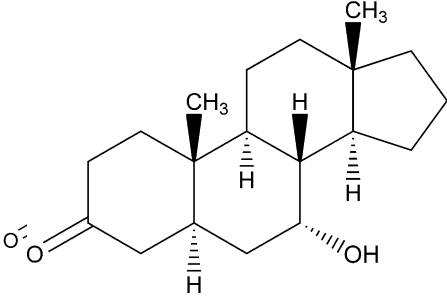 <p>The structure shows a steroid nucleus with a ketone group at C-3, a hydroxyl group at C-7, and methyl groups at C-10 and C-13. The stereochemistry at C-5 is <math>\alpha</math> (wedged bond to H).</p>                                |
| 2      | 286         | Androst-4-en-3,6-dione,<br>MW 286                                        |  <p>The structure shows a steroid nucleus with ketone groups at C-3 and C-6, a double bond at C-4, and methyl groups at C-10 and C-13. The stereochemistry at C-5 is <math>\alpha</math> (wedged bond to H).</p>                           |
|        |             | or<br>4,4-Dimethyl-androst-5-ene,<br>MW 286                              |  <p>The structure shows a steroid nucleus with a double bond at C-5, two methyl groups at C-4, and methyl groups at C-10 and C-13. The stereochemistry at C-5 is <math>\alpha</math> (wedged bond to H).</p>                              |
| 3      | 272?        | 3 $\alpha$ -Hydroxy-17-ethylidene-5 $\alpha$ -androstan-3-one,<br>MW 286 |  <p>The structure shows a steroid nucleus with a ketone group at C-3, a hydroxyl group at C-3, an ethylidene group at C-17, and methyl groups at C-10 and C-13. The stereochemistry at C-5 is <math>\alpha</math> (wedged bond to H).</p> |

**Supplementary Table S4. Additional samples tested for GFP-GR and GFP-AR translocation efficiency.**

(a) Geographic location, time, and methods of collection of the water samples.

| Samples   | Date/year  | Location                                       | Collection method |
|-----------|------------|------------------------------------------------|-------------------|
| Plate 1   |            |                                                |                   |
| R1        | 9/2/2008   | Ohio River, Wheeling WV                        | Grab sample       |
| R2        | 9/3/2008   | Ohio River, Parkersburg, WV                    | Grab sample       |
| R3        | 9/3/2008   | Upstream Brighton Dam, Tridelphia resevoir, MD | Grab sample       |
| R4A       | 9/10/2008  | Patuxent/Western Branch, MD                    | Grab sample       |
| R4E       | 9/10/2008  | Patuxent/Western Branch, MD (WWTP effluent)    | Grab sample       |
| R5        | 9/15/2008  | Seneca River, NY                               | Grab sample       |
| R6        | 9/16/2008  | Seneca River, NY                               | Grab sample       |
| R7        | 9/22/2008  | St. Croix River, ME                            | Grab sample       |
| R8        | 9/23/2008  | St. Croix River, ME                            | Grab sample       |
| R9        | 10/2/2008  | Sudbury river, MA                              | Grab sample       |
| R10       | 10/3/2008  | Sudbury river, MA                              | Grab sample       |
| R13       | 10/15/2008 | Rappahanock River, VA                          | Grab sample       |
| R14       | 10/15/2008 | Rappahanock River, VA                          | Grab sample       |
| R15       | 10/6/2008  | Rappahanock River, VA                          | Grab sample       |
| R16       | 10/27/2008 | Darby Creek, PA                                | Grab sample       |
| R16W      | 10/27/2008 | Darby Creek, PA (WWTP effluent)                | Grab sample       |
| R21       | 9/1/2009   | Missisquoi River, VT                           | Grab sample       |
| R22       | 9/1/2009   | Missisquoi River, VT                           | Grab sample       |
| R22W      | 9/1/2009   | Missisquoi River, VT (WWTP effluent)           | Grab sample       |
| R23       | 9/14/2009  | Penobscot River, ME                            | Grab sample       |
| R24       | 9/15/2009  | Penobscot River, ME                            | Grab sample       |
| R26       | 9/22/2009  | Peconic Lake, NY                               | Grab sample       |
| R27       | 9/28/2009  | Potomac River, Pohick, VA                      | Grab sample       |
| R27W      | 9/28/2009  | Potomac River, Pohick, VA (WWTP effluent)      | Grab sample       |
| R28       | 9/29/2009  | Burke Lake, VA                                 | Grab sample       |
| R29       | 10/5/2009  | Delaware River, Cherry Valley, DE              | Grab sample       |
| R30       | 10/6/2009  | Delaware River, Easton, PA                     | Grab sample       |
| R31       | 10/13/2009 | Susquehana River, Garret Island, PA            | Grab sample       |
| R32 Broad | 10/14/2009 | Susquehana River, Conowingo Dam, PA            | Grab sample       |
| R32 CON   | 10/14/2009 | Susquehana River, Conowingo Dam, PA            | Grab sample       |
| PSS2a     | 5/14/2010  | Gooney Run, VA                                 | Grab sample       |
| PSS2b     | 6/14/2010  | Gooney Run, VA                                 | Grab sample       |
| PSS3a     | 5/14/2010  | Passage Creek, VA                              | Grab sample       |
| PSS3b     | 6/15/2010  | Passage Creek, VA                              | Grab sample       |
| PSS4a     | 5/14/2010  | Stony Creek (upstream), VA                     | Grab sample       |
| PSS4b     | 6/15/2010  | Stony Creek (upstream), VA                     | Grab sample       |
| PSS5a     | 5/14/2010  | Stony Creek (downstream), VA                   | Grab sample       |
| PSS5b     | 6/15/2010  | Stony Creek (downstream), VA                   | Grab sample       |
| PSS6a     | 5/13/2010  | Mill Creek, VA                                 | Grab sample       |
| PSS6b     | 6/14/2010  | Mill Creek, VA                                 | Grab sample       |
| PSS7a     | 5/14/2010  | Hawksbill Creek, VA                            | Grab sample       |
| PSS7b     | 6/14/2010  | Hawksbill Creek, VA                            | Grab sample       |



|         |                 |                                                      |             |
|---------|-----------------|------------------------------------------------------|-------------|
| PSS8a   | 5/13/2010       | Smith Creek (downstream), VA                         | Grab sample |
| PSS8b   | 6/14/2010       | Smith Creek (downstream), VA                         | Grab sample |
| PSS9a   | 5/12/2010       | Naked Creek, VA                                      | Grab sample |
| PSS9b   | 6/15/2010       | Naked Creek, VA                                      | Grab sample |
| PSS10a  | 5/13/2010       | Briery Branch, VA                                    | Grab sample |
| PSS10b  | 6/15/2010       | Briery Branch, VA                                    | Grab sample |
| PSS11a  | 5/13/2010       | Smith Creek (upstream), VA                           | Grab sample |
| PSS11b  | 6/14/2010       | Smith Creek (upstream), VA                           | Grab sample |
| PSS12a  | 5/13/2010       | Long Glade Creek, VA                                 | Grab sample |
| PSS12b  | 6/14/2010       | Long Glade Creek, VA                                 | Grab sample |
| PSS13a  | 5/13/2010       | Linville Creek, VA                                   | Grab sample |
| PSS13b  | 6/14/2010       | Linville Creek, VA                                   | Grab sample |
| PSS14a  | 5/13/2010       | Long Meadow Run, VA                                  | Grab sample |
| PSS14b  | 6/14/2010       | Long Meadow Run, VA                                  | Grab sample |
| PSS15a  | 5/13/2010       | Muddy Creek, VA                                      | Grab sample |
| PSS15b  | 6/15/2010       | Muddy Creek, VA                                      | Grab sample |
| PSS16a  | 5/12/2010       | Cooks Creek, VA                                      | Grab sample |
| PSS16b  | 6/14/2010       | Cooks Creek, VA                                      | Grab sample |
| Dairy   | 9/28/2010       | North Fork Shenandoah at Woodstock, VA               | Grab sample |
| LF1a    | 10/15/2008      | WWTP1 effluent, Rappahannock river, Little Falls, VA | Grab sample |
| LF2a    | 10/15/2008      | WWTP2 effluent, Rappahannock river, Little Falls, VA | Grab sample |
| LF3a    | 10/15/2008      | WWTP3 effluent, Rappahannock river, Little Falls, VA | Grab sample |
| LF4a    | 10/15/2008      | WWTP4 effluent, Rappahannock river, Little Falls, VA | Grab sample |
| SUS1    | 5/12/2009       | Susquehanna river at Mahantango Access, PA           | Grab sample |
| SUS2    | 5/13/2009       | West Branch Susquehanna river, PA                    | Grab sample |
| Plate 2 |                 |                                                      |             |
| SUS5    | 4/21/10-6/1/10  | Juniata River, Newport, PA                           | POCIS       |
| SUS6    | 4/21/10-6/1/10  | Susquehanna River at Mahantango Creek, PA            | POCIS       |
| DE1     | 4/19/10-6/3/10  | Delaware River, Yardley, PA                          | POCIS       |
| AL1     | 4/28/10-6/7/10  | Allegheny River, Kittanning, PA                      | POCIS       |
| PSS16   | 5/12/10-6/14/10 | Cooks Creek, VA                                      | POCIS       |
| PSS09   | 5/12/10-6/15/10 | Naked Creek, VA                                      | POCIS       |
| PSS15   | 5/13/10-6/15/10 | Muddy Creek, VA                                      | POCIS       |
| PSS10   | 5/13/10-6/15/10 | Briery Branch, VA                                    | POCIS       |
| PSS12   | 5/13/10-6/14/10 | Long Glade Creek, VA                                 | POCIS       |
| PSS11   | 5/13/10-6/14/10 | Smith Creek (upstream), VA                           | POCIS       |
| PSS13   | 5/13/10-6/14/10 | Linville Creek, VA                                   | POCIS       |
| PSS14   | 5/13/10-6/14/10 | Long Meadow Run, VA                                  | POCIS       |
| PSS08   | 5/13/10-6/14/10 | Smith Creek (downstream), VA                         | POCIS       |
| PSS06   | 5/13/10-6/14/10 | Mill Creek, VA                                       | POCIS       |
| PSS02   | 5/14/10-6/14/10 | Gooney Run, VA                                       | POCIS       |
| PSS07   | 5/14/10-6/14/10 | Hawksbill Creek, VA                                  | POCIS       |
| PSS03   | 5/14/10-6/14/10 | Passage Creek, VA                                    | POCIS       |
| PSS05   | 5/14/10-6/14/10 | Stony Creek (downstream), VA                         | POCIS       |
| PSS04   | 5/14/10-6/14/10 | Stony Creek (upstream), VA                           | POCIS       |
| FAB     | 6/1/2010        | Blank                                                | POCIS       |
| 1FB     | 6/1/2010        | Blank                                                | POCIS       |

|         |            |                                                   |             |
|---------|------------|---------------------------------------------------|-------------|
| 2FB     | 6/1/2010   | Blank                                             | POCIS       |
| 3FB     | 6/1/2010   | Blank                                             | POCIS       |
| 4FV     | 6/1/2010   | Blank                                             | POCIS       |
| 5FB     | 6/1/2010   | Blank                                             | POCIS       |
| 6FB     | 6/1/2010   | Blank                                             | POCIS       |
| 7FB     | 6/1/2010   | Blank                                             | POCIS       |
| 8FB     | 6/1/2010   | Blank                                             | POCIS       |
| 9FB     | 6/1/2010   | Blank                                             | POCIS       |
| 10FB    | 6/1/2010   | Blank                                             | POCIS       |
| 11FB    | 6/1/2010   | Blank                                             | POCIS       |
| 12FB    | 6/1/2010   | Blank                                             | POCIS       |
| 13FB    | 6/1/2010   | Blank                                             | POCIS       |
| 14FB    | 6/1/2010   | Blank                                             | POCIS       |
| 15FB    | 6/1/2010   | Blank                                             | POCIS       |
| 16FB    | 6/1/2010   | Blank                                             | POCIS       |
| 17FB    | 6/1/2010   | Blank                                             | POCIS       |
| 18FB    | 6/1/2010   | Blank                                             | POCIS       |
| 19FB    | 6/1/2010   | Blank                                             | POCIS       |
| BLANK   | 6/1/2010   | Blank                                             | POCIS       |
| R38     | 9/20/2010  | PA Erie (Pond H)                                  | Grab sample |
| R39     | 9/28/2010  | NJ Great Swamp (Hidden Valley Nursery)            | Grab sample |
| R40     | 10/4/2010  | VA Back Bay                                       | Grab sample |
| R41     | 10/5/2010  | VA Wilna Pond                                     | Grab sample |
| R42     | 10/6/2010  | VA Chandler's Mill Pond                           | Grab sample |
| R43     | 10/13/2010 | MD Patuxent (Snowden Pond)                        | Grab sample |
| R44     | 10/13/2010 | MD Patuxent (Cash Lake)                           | Grab sample |
| GL1     | 10/1/2010  | Genesee River, NY                                 | Grab sample |
| GL2W    | 10/1/2010  | St. Louis River, Duluth, MN (WWTP effluent)       | Grab sample |
| GL2P    | 10/1/2010  | St. Louis River, Duluth, MN (PowerPlant effluent) | Grab sample |
| GL5     | 10/1/2010  | Fox river, Green Bay, WI                          | Grab sample |
| GL4CSOa | 10/1/2010  | Swan Creek, Ohio                                  | Grab sample |
| GL4CSOb | 10/1/2010  | Swan Creek, Ohio                                  | Grab sample |
| GL4CSOc | 10/1/2010  | Swan Creek, Ohio                                  | Grab sample |
| GL3a    | 10/1/2010  | Detroit River, MI                                 | Grab sample |
| GL3b    | 10/1/2010  | Detroit River, MI                                 | Grab sample |
| GL3c    | 10/1/2010  | Detroit River, MI                                 | Grab sample |
| R36     | 9/14/2010  | Missisquoi River (Gander Bay & Goose Bay), VT     | Grab sample |
| R37     | 9/16/2010  | Lake Umbagog, MA                                  | Grab sample |

**Supplementary Table S4. Additional samples tested for GFP-GR and GFP-AR translocation efficiency.**

(b) Activity of the samples in the GFP-GR and GFP-AR translocation assays (P<0.01 and P<0.05, asterisks).

| Samples   | GR translocation |        | AR translocation |        |
|-----------|------------------|--------|------------------|--------|
|           | P<0.01           | P<0.05 | P<0.01           | P<0.05 |
| Plate 1   |                  |        |                  |        |
| R1        | FALSE            | FALSE  | FALSE            | FALSE  |
| R2        | FALSE            | FALSE  | FALSE            | FALSE  |
| R3        | FALSE            | FALSE  | FALSE            | FALSE  |
| R4A       | *                | *      | *                | *      |
| R4E       | *                | *      | *                | *      |
| R5        | FALSE            | FALSE  | FALSE            | FALSE  |
| R6        | FALSE            | FALSE  | FALSE            | FALSE  |
| R7        | FALSE            | FALSE  | FALSE            | FALSE  |
| R8        | FALSE            | FALSE  | *                | *      |
| R9        | FALSE            | FALSE  | *                | *      |
| R10       | FALSE            | FALSE  | *                | *      |
| R13       | FALSE            | FALSE  | FALSE            | FALSE  |
| R14       | FALSE            | FALSE  | FALSE            | FALSE  |
| R15       | FALSE            | FALSE  | *                | *      |
| R16       | FALSE            | FALSE  | *                | *      |
| R16W      | *                | *      | FALSE            | *      |
| R21       | FALSE            | FALSE  | FALSE            | FALSE  |
| R22       | FALSE            | FALSE  | FALSE            | FALSE  |
| R22W      | FALSE            | FALSE  | FALSE            | FALSE  |
| R23       | FALSE            | FALSE  | FALSE            | FALSE  |
| R24       | FALSE            | FALSE  | FALSE            | FALSE  |
| R26       | FALSE            | FALSE  | FALSE            | FALSE  |
| R27       | *                | *      | FALSE            | FALSE  |
| R27W      | FALSE            | FALSE  | FALSE            | FALSE  |
| R28       | FALSE            | FALSE  | FALSE            | FALSE  |
| R29       | FALSE            | FALSE  | FALSE            | FALSE  |
| R30       | FALSE            | FALSE  | FALSE            | FALSE  |
| R31       | FALSE            | FALSE  | FALSE            | FALSE  |
| R32 Broad | FALSE            | FALSE  | FALSE            | FALSE  |
| R32 CON   | FALSE            | FALSE  | FALSE            | FALSE  |
| PSS2a     | FALSE            | FALSE  | FALSE            | FALSE  |
| PSS2b     | FALSE            | FALSE  | FALSE            | FALSE  |
| PSS3a     | FALSE            | FALSE  | FALSE            | FALSE  |
| PSS3b     | FALSE            | FALSE  | FALSE            | FALSE  |
| PSS4a     | FALSE            | FALSE  | FALSE            | FALSE  |
| PSS4b     | FALSE            | FALSE  | FALSE            | FALSE  |
| PSS5a     | FALSE            | FALSE  | FALSE            | FALSE  |
| PSS5b     | FALSE            | FALSE  | FALSE            | FALSE  |
| PSS6a     | FALSE            | FALSE  | FALSE            | FALSE  |
| PSS6b     | FALSE            | FALSE  | *                | *      |
| PSS7a     | FALSE            | FALSE  | FALSE            | FALSE  |

|         |       |       |       |       |
|---------|-------|-------|-------|-------|
| PSS7b   | FALSE | FALSE | FALSE | FALSE |
| PSS8a   | FALSE | FALSE | FALSE | FALSE |
| PSS8b   | FALSE | FALSE | FALSE | FALSE |
| PSS9a   | FALSE | FALSE | FALSE | FALSE |
| PSS9b   | FALSE | FALSE | FALSE | FALSE |
| PSS10a  | FALSE | FALSE | FALSE | FALSE |
| PSS10b  | FALSE | FALSE | FALSE | FALSE |
| PSS11a  | FALSE | FALSE | FALSE | FALSE |
| PSS11b  | FALSE | FALSE | FALSE | *     |
| PSS12a  | FALSE | FALSE | FALSE | FALSE |
| PSS12b  | FALSE | FALSE | *     | *     |
| PSS13a  | FALSE | FALSE | FALSE | FALSE |
| PSS13b  | FALSE | FALSE | *     | *     |
| PSS14a  | FALSE | FALSE | FALSE | FALSE |
| PSS14b  | FALSE | FALSE | *     | *     |
| PSS15a  | FALSE | FALSE | *     | *     |
| PSS15b  | FALSE | FALSE | FALSE | FALSE |
| PSS16a  | FALSE | FALSE | FALSE | FALSE |
| PSS16b  | FALSE | FALSE | *     | *     |
| Dairy   | FALSE | FALSE | FALSE | FALSE |
| LF1a    | FALSE | *     | *     | *     |
| LF2a    | *     | *     | *     | *     |
| LF3a    | *     | *     | FALSE | FALSE |
| LF4a    | *     | *     | FALSE | *     |
| SUS1    | FALSE | FALSE | FALSE | FALSE |
| SUS2    | FALSE | FALSE | FALSE | FALSE |
| Plate 2 |       |       |       |       |
| SUS5    | *     | *     | *     | *     |
| SUS6    | *     | *     | *     | *     |
| DE1     | *     | *     | *     | *     |
| AL1     | *     | *     | *     | *     |
| PSS16   | *     | *     | *     | *     |
| PSS09   | *     | *     | *     | *     |
| PSS15   | *     | *     | *     | *     |
| PSS10   | *     | *     | *     | *     |
| PSS12   | *     | *     | *     | *     |
| PSS11   | *     | *     | FALSE | *     |
| PSS13   | *     | *     | *     | *     |
| PSS14   | *     | *     | *     | *     |
| PSS08   | *     | *     | FALSE | *     |
| PSS06   | *     | *     | *     | *     |
| PSS02   | *     | *     | *     | *     |
| PSS07   | *     | *     | *     | *     |
| PSS03   | FALSE | FALSE | FALSE | FALSE |
| PSS05   | *     | *     | *     | *     |
| PSS04   | *     | *     | FALSE | FALSE |
| FAB     | FALSE | FALSE | FALSE | FALSE |

|         |       |       |       |       |
|---------|-------|-------|-------|-------|
| 1FB     | FALSE | FALSE | FALSE | FALSE |
| 2FB     | FALSE | FALSE | FALSE | FALSE |
| 3FB     | FALSE | FALSE | FALSE | FALSE |
| 4FV     | FALSE | FALSE | FALSE | FALSE |
| 5FB     | FALSE | FALSE | FALSE | FALSE |
| 6FB     | FALSE | FALSE | FALSE | FALSE |
| 7FB     | FALSE | FALSE | FALSE | FALSE |
| 8FB     | FALSE | FALSE | FALSE | FALSE |
| 9FB     | FALSE | FALSE | FALSE | FALSE |
| 10FB    | FALSE | FALSE | FALSE | FALSE |
| 11FB    | FALSE | FALSE | FALSE | FALSE |
| 12FB    | FALSE | FALSE | FALSE | FALSE |
| 13FB    | FALSE | FALSE | FALSE | FALSE |
| 14FB    | FALSE | FALSE | FALSE | FALSE |
| 15FB    | FALSE | FALSE | FALSE | FALSE |
| 16FB    | FALSE | FALSE | FALSE | FALSE |
| 17FB    | FALSE | FALSE | FALSE | FALSE |
| 18FB    | FALSE | FALSE | FALSE | FALSE |
| 19FB    | FALSE | FALSE | FALSE | FALSE |
| BLANK   | FALSE | FALSE | FALSE | FALSE |
| R38     | FALSE | FALSE | FALSE | FALSE |
| R39     | FALSE | FALSE | FALSE | FALSE |
| R40     | FALSE | FALSE | FALSE | FALSE |
| R41     | FALSE | FALSE | FALSE | FALSE |
| R42     | FALSE | FALSE | FALSE | FALSE |
| R43     | FALSE | FALSE | FALSE | FALSE |
| R44     | FALSE | FALSE | FALSE | FALSE |
| GL1     | FALSE | FALSE | FALSE | FALSE |
| GL2W    | *     | *     | FALSE | *     |
| GL2P    | FALSE | FALSE | FALSE | FALSE |
| GL5     | FALSE | FALSE | FALSE | FALSE |
| GL4CSOa | FALSE | *     | *     | *     |
| GL4CSOb | *     | *     | *     | *     |
| GL4CSOc | FALSE | FALSE | *     | *     |
| GL3a    | FALSE | FALSE | FALSE | FALSE |
| GL3b    | FALSE | FALSE | FALSE | FALSE |
| GL3c    | *     | *     | FALSE | FALSE |
| R36     | FALSE | FALSE | FALSE | FALSE |
| R37     | FALSE | FALSE | FALSE | FALSE |
